# Supplementary material for: Detection of nerve gases using surface-enhanced Raman scattering substrates with high droplet adhesion
Source: Royal Society of Chemistry journal article supplement (doi:10.1039/c5nr06524k), 2015-12-10
Supplement: c5nr06524k1.pdf [file c5nr06524k1.pdf]

## **Supporting information for:**

### **Detection of nerve gases using surface-enhanced Raman scattering substrates with high droplet adhesion**

Aron Hakonen<sup>\*†</sup>, Tomas Rindcevcicius<sup>‡</sup>, Michael Stenbæk Schmidt<sup>‡</sup>, Per Ola Andersson<sup>§</sup>, Lars Juhlin<sup>§</sup>, Mikael Svedendahl<sup>†</sup>, Anja Boisen<sup>‡</sup> and Mikael Käll<sup>†</sup>

<sup>†</sup> Department of Applied Physics, Division of Bionanophotonics, Chalmers University of Technology, Gothenburg, Sweden. E-mail: Hakonen@chalmers.se, Tel: +46704964657; <sup>‡</sup> DTU Nanotech, Technical University of Denmark, Department of Micro- and Nanotechnology, Ørsted's Plads, Building 345 east, 2800 Kgs. Lyngby; <sup>§</sup> Swedish Defense Research Agency FOI, Dept CBRN Def & Security, SE-90182 Umeå, Sweden

## Methods

### Nanofabrication

The gold-coated silicon nanopillar SERS substrates were fabricated using a three-step process. In brief, maskless silicon reactive ion etching is utilized to form vertically free standing silicon (Si) pillars with  $r \approx 20$  nm in pillars/ $\mu\text{m}^2$ ). Next, the Si nanopillar surface is treated by an  $\text{O}_2$ -plasma, and finally, a 200 nm thick gold film is deposited using e-beam evaporation process. Forming nanopillars with dimensions according to the cartoon below.

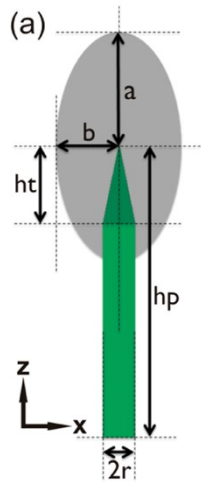

Fig. S1 Pillar dimensions are:  $a \approx 155$  nm,  $b \approx 62$  nm,  $r \approx 20$  nm,  $h_p \approx 400$  nm,  $h_t \approx 100$  nm.

### Raman measurements

A portable Raman instrument, First Defender RMX (Thermo Fisher Scientific Inc, Fig. 2a), was used with a fixed integration time of 10 s and medium output power (measured to 88 mW) for the 785 nm diode laser beam focused on the SERS sample via the flexible optical cable and a lens mounted on an aluminium plate with a working distance of 5 mm. The laser spot diameter on the SERS substrates was approximately  $150 \mu\text{m}$  and the spectral resolution was about  $10 \text{ cm}^{-1}$  according to the manufacturer.

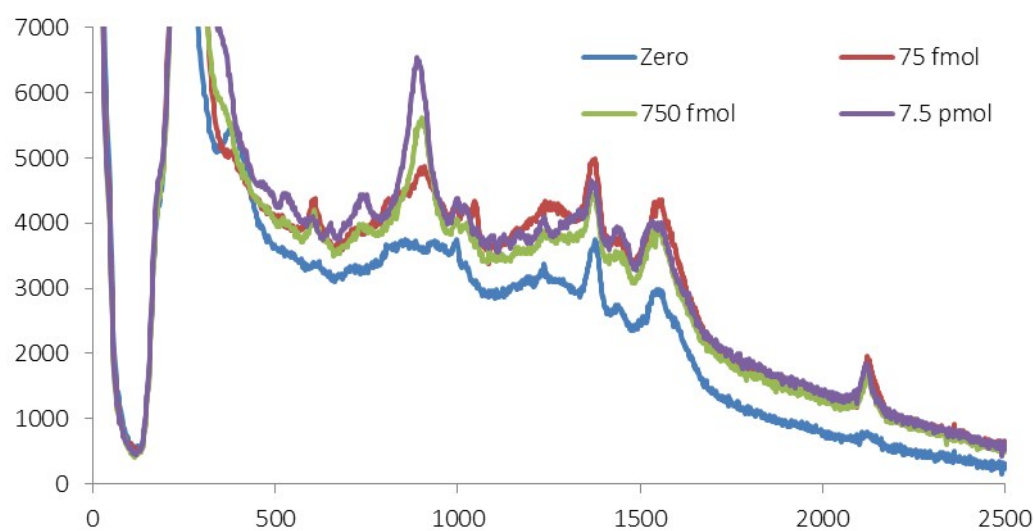

Fig. S2 Concentration dependence of VX.

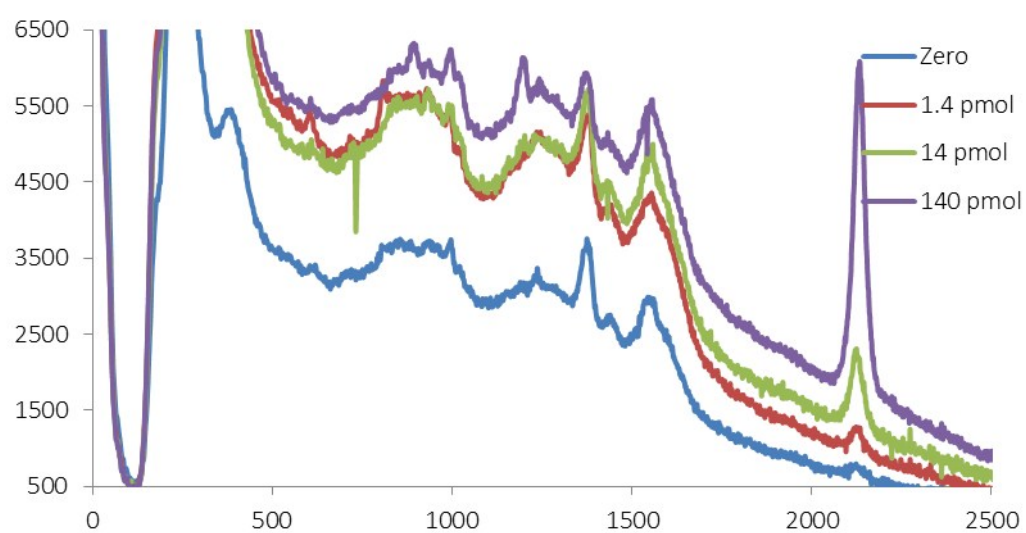

Fig. S3 Concentration dependence of Tabun.
